# Supplementary material
Source: PubMed Central journal article supplement (PMC4451377)

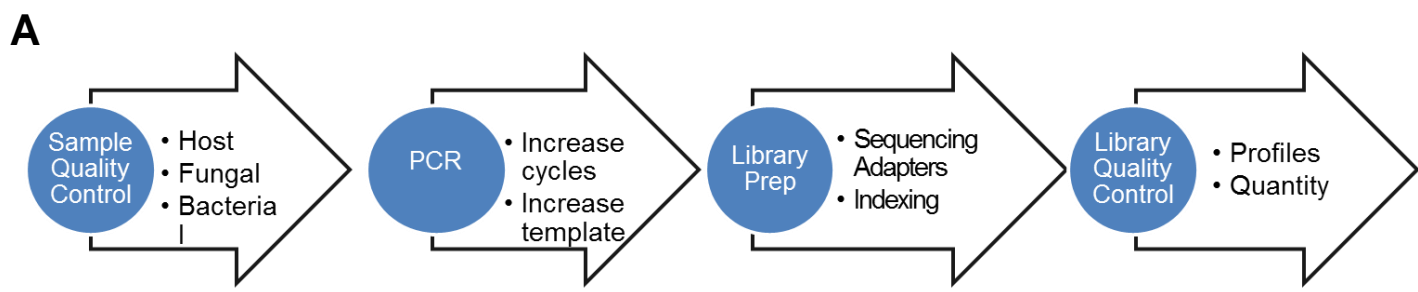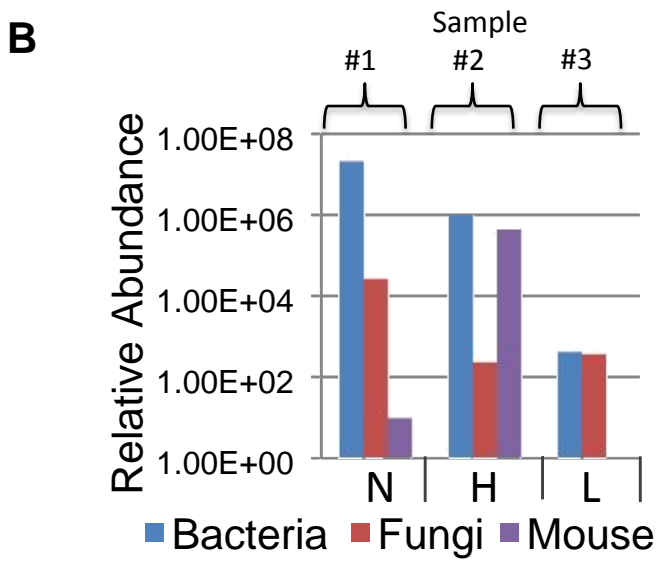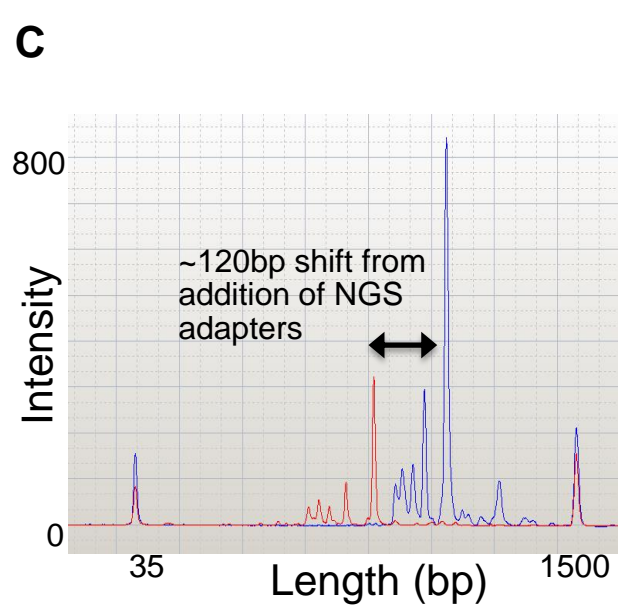

Supplementary Figure 1

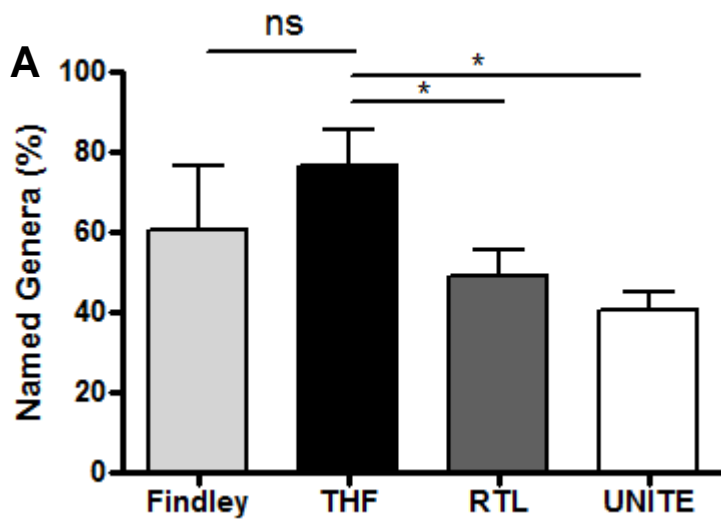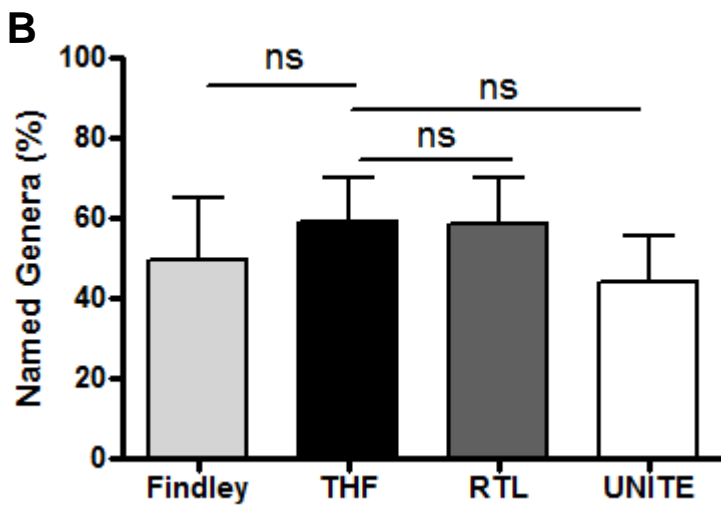

Supplement: NIHMS682355-supplement-1.pdf [file NIHMS682355-supplement-1.pdf]
